# Supplementary material
Source: publisher figshare collection journal article supplement (https://acs.figshare.com/ndownloader/files/5219398)
Supplement: Supplementary file 1 [file 5219398]

 
data_ccd767 
 
_audit_creation_method            SHELXL-97 
_chemical_name_systematic 
; 
 ? 
; 
_chemical_name_common             ? 
_chemical_melting_point           ? 
_chemical_formula_moiety          ? 
_chemical_formula_sum 
 'C11 H10 F4 Ti' 
_chemical_formula_weight          266.09 
 
loop_ 
 _atom_type_symbol 
 _atom_type_description 
 _atom_type_scat_dispersion_real 
 _atom_type_scat_dispersion_imag 
 _atom_type_scat_source 
 'C'  'C'   0.0033   0.0016 
 'International Tables Vol C Tables 4.2.6.8 and 6.1.1.4' 
 'H'  'H'   0.0000   0.0000 
 'International Tables Vol C Tables 4.2.6.8 and 6.1.1.4' 
 'F'  'F'   0.0171   0.0103 
 'International Tables Vol C Tables 4.2.6.8 and 6.1.1.4' 
 'Ti'  'Ti'   0.2776   0.4457 
 'International Tables Vol C Tables 4.2.6.8 and 6.1.1.4' 
 
_symmetry_cell_setting            monoclinic 
_symmetry_space_group_name_H-M    'P 21/c' 
 
loop_ 
 _symmetry_equiv_pos_as_xyz 
 'x, y, z' 
 '-x, y+1/2, -z+1/2' 
 '-x, -y, -z' 
 'x, -y-1/2, z-1/2' 
 
_cell_length_a                    7.780(3) 
_cell_length_b                    16.761(6) 
_cell_length_c                    16.121(6) 
_cell_angle_alpha                 90.00 
_cell_angle_beta                  93.788(6) 
_cell_angle_gamma                 90.00 
_cell_volume                      2097.7(13) 
_cell_formula_units_Z             8 
_cell_measurement_temperature     203(2) 
_cell_measurement_reflns_used     ? 
_cell_measurement_theta_min       ? 
_cell_measurement_theta_max       ? 
 
_exptl_crystal_description        'multifaceted block'
_exptl_crystal_colour             orange 
_exptl_crystal_size_max           0.40 
_exptl_crystal_size_mid           0.15 
_exptl_crystal_size_min           0.10 
_exptl_crystal_density_meas       ? 
_exptl_crystal_density_diffrn     1.685 
_exptl_crystal_density_method     'not measured' 
_exptl_crystal_F_000              1072 
_exptl_absorpt_coefficient_mu     0.839 
_exptl_absorpt_correction_type    ? 
_exptl_absorpt_correction_T_min   0.7303 
_exptl_absorpt_correction_T_max   0.9208 
_exptl_absorpt_process_details    'SADABS (Sheldrick, 1996)' 
 
_exptl_special_details 
; 
 ? 
; 
 
_diffrn_ambient_temperature       203(2) 
_diffrn_radiation_wavelength      0.71073 
_diffrn_radiation_type            MoK\a 
_diffrn_radiation_source          'fine-focus sealed tube' 
_diffrn_radiation_monochromator   graphite 
_diffrn_measurement_device_type   'Bruker P4/CCD' 
_diffrn_measurement_method        '\f scans' 
_diffrn_detector_area_resol_mean  ? 
_diffrn_standards_number          ? 
_diffrn_standards_interval_count  ? 
_diffrn_standards_interval_time   ? 
_diffrn_standards_decay_%         '< 2' 
_diffrn_reflns_number             10974 
_diffrn_reflns_av_R_equivalents   0.0215 
_diffrn_reflns_av_sigmaI/netI     0.0154 
_diffrn_reflns_limit_h_min        -6 
_diffrn_reflns_limit_h_max        8 
_diffrn_reflns_limit_k_min        -18 
_diffrn_reflns_limit_k_max        18 
_diffrn_reflns_limit_l_min        -17 
_diffrn_reflns_limit_l_max        17 
_diffrn_reflns_theta_min          1.75 
_diffrn_reflns_theta_max          23.27 
_reflns_number_total              2989 
_reflns_number_gt                 2754 
_reflns_threshold_expression      >2sigma(I) 
 
_computing_data_collection        'Siemens SMART (v. 4.202, Siemens 1996)' 
_computing_cell_refinement        'Bruker SAINT (v. 5.00, Bruker 1998)' 
_computing_data_reduction         'Bruker SAINT (v. 5.00, Bruker 1998)' 
_computing_structure_solution     'SHELXS-97 (Sheldrick, 1990)' 
_computing_structure_refinement   'SHELXL-97 (Sheldrick, 1997)' 
_computing_molecular_graphics     'Bruker AXS SHEXTL (v. 5.10)'   
_computing_publication_material   'SHELXL-97 (Sheldrick, 1997)'  
 
_refine_special_details 
; 
 Refinement of F^2^ against ALL reflections.  The weighted R-factor wR and 
 goodness of fit S are based on F^2^, conventional R-factors R are based 
 on F, with F set to zero for negative F^2^. The threshold expression of 
 F^2^ > 2sigma(F^2^) is used only for calculating R-factors(gt) etc. and is 
 not relevant to the choice of reflections for refinement.  R-factors based 
 on F^2^ are statistically about twice as large as those based on F, and R- 
 factors based on ALL data will be even larger. 
; 
 
_refine_ls_structure_factor_coef  Fsqd  
_refine_ls_matrix_type            full 
_refine_ls_weighting_scheme       calc  
_refine_ls_weighting_details 
 'calc w=1/[\s^2^(Fo^2^)+(0.0422P)^2^+0.0000P] where P=(Fo^2^+2Fc^2^)/3' 
_atom_sites_solution_primary      direct 
_atom_sites_solution_secondary    difmap 
_atom_sites_solution_hydrogens    geom 
_refine_ls_hydrogen_treatment     mixed 
_refine_ls_extinction_method      none 
_refine_ls_extinction_coef        ? 
_refine_ls_number_reflns          2989 
_refine_ls_number_parameters      289 
_refine_ls_number_restraints      0 
_refine_ls_R_factor_all           0.0417 
_refine_ls_R_factor_gt            0.0373 
_refine_ls_wR_factor_ref          0.1007 
_refine_ls_wR_factor_gt           0.0995 
_refine_ls_goodness_of_fit_ref    1.818 
_refine_ls_restrained_S_all       1.818 
_refine_ls_shift/su_max           0.000 
_refine_ls_shift/su_mean          0.000 
 
loop_ 
 _atom_site_label 
 _atom_site_type_symbol 
 _atom_site_fract_x 
 _atom_site_fract_y 
 _atom_site_fract_z 
 _atom_site_U_iso_or_equiv 
 _atom_site_adp_type 
 _atom_site_occupancy 
 _atom_site_symmetry_multiplicity 
 _atom_site_calc_flag 
 _atom_site_refinement_flags 
 _atom_site_disorder_assembly 
 _atom_site_disorder_group 
Ti1 Ti 0.01951(6) 0.45298(3) 0.30979(3) 0.02848(18) Uani 1 1 d . . . 
Ti2 Ti 0.50323(6) 0.31508(3) -0.00251(3) 0.02861(18) Uani 1 1 d . . . 
F1 F -0.3532(2) 0.50654(12) 0.25483(13) 0.0622(6) Uani 1 1 d . . . 
F2 F -0.3171(3) 0.49193(12) 0.38691(12) 0.0608(6) Uani 1 1 d . . . 
F3 F -0.3494(2) 0.39044(11) 0.30832(12) 0.0562(5) Uani 1 1 d . . . 
F4 F 0.0262(2) 0.39030(9) 0.40300(9) 0.0442(4) Uani 1 1 d . . . 
F5 F 0.1584(2) 0.30599(13) -0.11090(11) 0.0611(5) Uani 1 1 d . . . 
F6 F 0.2062(3) 0.42169(13) -0.05909(15) 0.0782(7) Uani 1 1 d . . . 
F7 F 0.1155(2) 0.32832(16) 0.01636(12) 0.0775(7) Uani 1 1 d . . . 
F8 F 0.5092(2) 0.39388(9) 0.07618(9) 0.0430(4) Uani 1 1 d . . . 
C1 C -0.0895(5) 0.3907(2) 0.18531(17) 0.0458(8) Uani 1 1 d . . . 
H1 H -0.2038 0.3982 0.1662 0.055 Uiso 1 1 calc R . . 
C2 C 0.0474(4) 0.43709(18) 0.16559(17) 0.0432(8) Uani 1 1 d . . . 
H2 H 0.0422 0.4814 0.1308 0.052 Uiso 1 1 calc R . . 
C3 C 0.1954(4) 0.4061(2) 0.20691(18) 0.0468(8) Uani 1 1 d . . . 
H3 H 0.3065 0.4262 0.2048 0.056 Uiso 1 1 calc R . . 
C4 C 0.1484(5) 0.34035(19) 0.25138(18) 0.0480(8) Uani 1 1 d . . . 
H4 H 0.2226 0.3081 0.2842 0.058 Uiso 1 1 calc R . . 
C5 C -0.0276(5) 0.33058(18) 0.23896(18) 0.0483(8) Uani 1 1 d . . . 
H5 H -0.0930 0.2910 0.2622 0.058 Uiso 1 1 calc R . . 
C6 C 0.2001(5) 0.5356(2) 0.3943(3) 0.0668(12) Uani 1 1 d . . . 
H6 H 0.2735 0.5124 0.4354 0.080 Uiso 1 1 calc R . . 
C7 C 0.0360(6) 0.56202(19) 0.4035(2) 0.0574(10) Uani 1 1 d . . . 
H7 H -0.0217 0.5604 0.4522 0.069 Uiso 1 1 calc R . . 
C8 C -0.0284(5) 0.59142(18) 0.3283(2) 0.0513(9) Uani 1 1 d . . . 
H8 H -0.1381 0.6126 0.3171 0.062 Uiso 1 1 calc R . . 
C9 C 0.0962(5) 0.58436(19) 0.2723(2) 0.0542(9) Uani 1 1 d . . . 
H9 H 0.0863 0.6004 0.2170 0.065 Uiso 1 1 calc R . . 
C10 C 0.2373(5) 0.5497(2) 0.3122(3) 0.0651(11) Uani 1 1 d . . . 
H10 H 0.3401 0.5376 0.2887 0.078 Uiso 1 1 calc R . . 
C11 C -0.2645(4) 0.46207(17) 0.31400(19) 0.0409(7) Uani 1 1 d . . . 
C12 C 0.6421(6) 0.2109(2) 0.0694(3) 0.0748(12) Uani 1 1 d . . . 
H12 H 0.7618 0.2129 0.0747 0.090 Uiso 1 1 calc R . . 
C13 C 0.5386(7) 0.2404(2) 0.1239(2) 0.0742(12) Uani 1 1 d . . . 
H13 H 0.5738 0.2644 0.1742 0.089 Uiso 1 1 calc R . . 
C14 C 0.3744(5) 0.22990(19) 0.0945(2) 0.0562(10) Uani 1 1 d . . . 
H14 H 0.2792 0.2468 0.1218 0.067 Uiso 1 1 calc R . . 
C15 C 0.3643(6) 0.1909(2) 0.0188(2) 0.0601(10) Uani 1 1 d . . . 
H15 H 0.2662 0.1772 -0.0142 0.072 Uiso 1 1 calc R . . 
C16 C 0.5446(7) 0.17653(18) 0.0028(2) 0.0763(15) Uani 1 1 d . . . 
H16 H 0.5858 0.1499 -0.0425 0.092 Uiso 1 1 calc R . . 
C17 C 0.7450(4) 0.3043(2) -0.08222(19) 0.0463(8) Uani 1 1 d . . . 
H17 H 0.8289 0.2662 -0.0683 0.056 Uiso 1 1 calc R . . 
C18 C 0.7423(4) 0.38268(19) -0.05263(19) 0.0469(8) Uani 1 1 d . . . 
H18 H 0.8241 0.4061 -0.0156 0.056 Uiso 1 1 calc R . . 
C19 C 0.5947(4) 0.41926(18) -0.08871(19) 0.0480(8) Uani 1 1 d . . . 
H19 H 0.5600 0.4715 -0.0797 0.058 Uiso 1 1 calc R . . 
C20 C 0.5090(4) 0.36409(19) -0.14040(18) 0.0480(8) Uani 1 1 d . . . 
H20 H 0.4071 0.3731 -0.1725 0.058 Uiso 1 1 calc R . . 
C21 C 0.6002(4) 0.29347(19) -0.13620(18) 0.0451(8) Uani 1 1 d . . . 
H21 H 0.5701 0.2467 -0.1646 0.054 Uiso 1 1 calc R . . 
C22 C 0.2312(4) 0.3434(2) -0.04196(19) 0.0483(8) Uani 1 1 d . . . 
 
loop_ 
 _atom_site_aniso_label 
 _atom_site_aniso_U_11 
 _atom_site_aniso_U_22 
 _atom_site_aniso_U_33 
 _atom_site_aniso_U_23 
 _atom_site_aniso_U_13 
 _atom_site_aniso_U_12 
Ti1 0.0288(3) 0.0296(3) 0.0270(3) -0.00012(19) 0.0023(2) 0.0017(2) 
Ti2 0.0258(3) 0.0273(3) 0.0328(3) 0.00203(19) 0.0020(2) 0.0014(2) 
F1 0.0362(11) 0.0732(14) 0.0767(13) 0.0336(11) -0.0006(9) 0.0094(9) 
F2 0.0513(13) 0.0718(13) 0.0626(13) -0.0024(10) 0.0287(10) 0.0032(10) 
F3 0.0467(12) 0.0530(11) 0.0697(12) 0.0111(9) 0.0091(9) -0.0159(9) 
F4 0.0617(12) 0.0402(9) 0.0304(8) 0.0041(7) 0.0008(8) 0.0100(8) 
F5 0.0383(11) 0.0922(15) 0.0512(11) -0.0173(10) -0.0104(9) -0.0028(10) 
F6 0.0581(14) 0.0646(14) 0.1088(18) -0.0124(12) -0.0183(13) 0.0334(11) 
F7 0.0312(11) 0.141(2) 0.0612(12) -0.0203(13) 0.0110(10) 0.0106(12) 
F8 0.0479(11) 0.0419(9) 0.0391(9) -0.0056(7) 0.0028(8) -0.0049(8) 
C1 0.047(2) 0.057(2) 0.0325(16) -0.0129(14) -0.0035(14) -0.0052(16) 
C2 0.058(2) 0.0439(17) 0.0278(14) -0.0026(13) 0.0060(14) -0.0035(16) 
C3 0.043(2) 0.0531(19) 0.0459(18) -0.0140(15) 0.0178(15) 0.0010(16) 
C4 0.059(2) 0.0451(18) 0.0408(16) -0.0092(14) 0.0076(15) 0.0179(16) 
C5 0.073(3) 0.0347(16) 0.0387(17) -0.0075(13) 0.0137(16) -0.0081(16) 
C6 0.068(3) 0.046(2) 0.081(3) -0.0123(19) -0.037(2) -0.0088(19) 
C7 0.091(3) 0.0392(18) 0.0442(19) -0.0151(15) 0.0235(19) -0.0181(19) 
C8 0.047(2) 0.0295(16) 0.077(2) -0.0067(16) 0.0051(18) 0.0024(14) 
C9 0.084(3) 0.0365(17) 0.0428(18) 0.0018(14) 0.0121(18) -0.0143(18) 
C10 0.044(2) 0.050(2) 0.104(3) -0.031(2) 0.029(2) -0.0209(18) 
C11 0.0381(19) 0.0400(17) 0.0451(17) 0.0114(14) 0.0075(14) -0.0007(14) 
C12 0.086(3) 0.052(2) 0.084(3) 0.026(2) -0.010(3) 0.015(2) 
C13 0.113(4) 0.059(2) 0.050(2) 0.0238(19) 0.003(2) -0.006(3) 
C14 0.075(3) 0.0410(19) 0.055(2) 0.0020(16) 0.025(2) -0.0156(17) 
C15 0.086(3) 0.0395(19) 0.055(2) 0.0012(15) 0.005(2) -0.0279(19) 
C16 0.153(5) 0.0186(16) 0.064(2) 0.0115(15) 0.059(3) 0.020(2) 
C17 0.0344(18) 0.055(2) 0.0512(18) 0.0090(15) 0.0166(15) 0.0096(15) 
C18 0.0374(19) 0.056(2) 0.0486(18) -0.0004(15) 0.0105(15) -0.0171(16) 
C19 0.058(2) 0.0340(16) 0.0542(19) 0.0120(15) 0.0218(17) 0.0006(16) 
C20 0.050(2) 0.054(2) 0.0401(17) 0.0180(15) 0.0018(14) -0.0013(16) 
C21 0.057(2) 0.0436(18) 0.0363(16) 0.0009(13) 0.0115(15) -0.0042(16) 
C22 0.0315(18) 0.064(2) 0.0481(18) -0.0147(16) -0.0050(15) 0.0089(16) 
 
_geom_special_details 
; 
 All esds (except the esd in the dihedral angle between two l.s. planes) 
 are estimated using the full covariance matrix.  The cell esds are taken 
 into account individually in the estimation of esds in distances, angles 
 and torsion angles; correlations between esds in cell parameters are only 
 used when they are defined by crystal symmetry.  An approximate (isotropic) 
 treatment of cell esds is used for estimating esds involving l.s. planes. 
; 
 
loop_ 
 _geom_bond_atom_site_label_1 
 _geom_bond_atom_site_label_2 
 _geom_bond_distance 
 _geom_bond_site_symmetry_2 
 _geom_bond_publ_flag 
Ti1 F4 1.8313(16) . ? 
Ti1 C11 2.221(3) . ? 
Ti1 C10 2.343(3) . ? 
Ti1 C6 2.344(3) . ? 
Ti1 C3 2.354(3) . ? 
Ti1 C4 2.362(3) . ? 
Ti1 C2 2.364(3) . ? 
Ti1 C5 2.365(3) . ? 
Ti1 C1 2.369(3) . ? 
Ti1 C7 2.369(3) . ? 
Ti1 C9 2.370(3) . ? 
Ti1 C8 2.372(3) . ? 
Ti2 F8 1.8298(16) . ? 
Ti2 C22 2.221(3) . ? 
Ti2 C12 2.322(4) . ? 
Ti2 C16 2.345(3) . ? 
Ti2 C17 2.354(3) . ? 
Ti2 C21 2.358(3) . ? 
Ti2 C18 2.366(3) . ? 
Ti2 C19 2.370(3) . ? 
Ti2 C20 2.373(3) . ? 
Ti2 C15 2.380(3) . ? 
Ti2 C14 2.386(3) . ? 
Ti2 C13 2.391(3) . ? 
F1 C11 1.362(3) . ? 
F2 C11 1.365(4) . ? 
F3 C11 1.370(3) . ? 
F5 C22 1.366(3) . ? 
F6 C22 1.352(4) . ? 
F7 C22 1.368(4) . ? 
C1 C2 1.373(5) . ? 
C1 C5 1.393(5) . ? 
C2 C3 1.393(5) . ? 
C3 C4 1.377(5) . ? 
C4 C5 1.381(5) . ? 
C6 C7 1.369(6) . ? 
C6 C10 1.394(6) . ? 
C7 C8 1.373(5) . ? 
C8 C9 1.373(5) . ? 
C9 C10 1.364(6) . ? 
C12 C13 1.326(6) . ? 
C12 C16 1.398(6) . ? 
C13 C14 1.345(6) . ? 
C14 C15 1.382(5) . ? 
C15 C16 1.463(6) . ? 
C17 C21 1.389(5) . ? 
C17 C18 1.398(5) . ? 
C18 C19 1.395(5) . ? 
C19 C20 1.386(5) . ? 
C20 C21 1.380(5) . ? 
 
loop_ 
 _geom_angle_atom_site_label_1 
 _geom_angle_atom_site_label_2 
 _geom_angle_atom_site_label_3 
 _geom_angle 
 _geom_angle_site_symmetry_1 
 _geom_angle_site_symmetry_3 
 _geom_angle_publ_flag 
F4 Ti1 C11 89.35(9) . . ? 
F4 Ti1 C10 113.70(14) . . ? 
C11 Ti1 C10 132.22(13) . . ? 
F4 Ti1 C6 83.01(12) . . ? 
C11 Ti1 C6 120.09(14) . . ? 
C10 Ti1 C6 34.61(14) . . ? 
F4 Ti1 C3 113.58(10) . . ? 
C11 Ti1 C3 132.11(12) . . ? 
C10 Ti1 C3 77.83(12) . . ? 
C6 Ti1 C3 104.64(15) . . ? 
F4 Ti1 C4 83.04(10) . . ? 
C11 Ti1 C4 121.11(12) . . ? 
C10 Ti1 C4 103.51(13) . . ? 
C6 Ti1 C4 116.71(14) . . ? 
C3 Ti1 C4 33.94(12) . . ? 
F4 Ti1 C2 137.96(9) . . ? 
C11 Ti1 C2 101.18(12) . . ? 
C10 Ti1 C2 88.90(14) . . ? 
C6 Ti1 C2 123.21(14) . . ? 
C3 Ti1 C2 34.33(12) . . ? 
C4 Ti1 C2 56.57(11) . . ? 
F4 Ti1 C5 83.90(9) . . ? 
C11 Ti1 C5 87.22(12) . . ? 
C10 Ti1 C5 134.17(13) . . ? 
C6 Ti1 C5 149.41(14) . . ? 
C3 Ti1 C5 56.55(12) . . ? 
C4 Ti1 C5 33.97(12) . . ? 
C2 Ti1 C5 56.55(10) . . ? 
F4 Ti1 C1 115.57(10) . . ? 
C11 Ti1 C1 75.80(12) . . ? 
C10 Ti1 C1 122.46(14) . . ? 
C6 Ti1 C1 156.93(14) . . ? 
C3 Ti1 C1 56.52(12) . . ? 
C4 Ti1 C1 56.50(12) . . ? 
C2 Ti1 C1 33.72(11) . . ? 
C5 Ti1 C1 34.24(11) . . ? 
F4 Ti1 C7 85.52(10) . . ? 
C11 Ti1 C7 86.55(14) . . ? 
C10 Ti1 C7 56.44(13) . . ? 
C6 Ti1 C7 33.76(14) . . ? 
C3 Ti1 C7 134.21(13) . . ? 
C4 Ti1 C7 149.76(14) . . ? 
C2 Ti1 C7 135.17(11) . . ? 
C5 Ti1 C7 167.77(12) . . ? 
C1 Ti1 C7 151.80(13) . . ? 
F4 Ti1 C9 138.42(10) . . ? 
C11 Ti1 C9 102.24(13) . . ? 
C10 Ti1 C9 33.65(14) . . ? 
C6 Ti1 C9 56.50(13) . . ? 
C3 Ti1 C9 87.87(12) . . ? 
C4 Ti1 C9 121.33(13) . . ? 
C2 Ti1 C9 79.23(11) . . ? 
C5 Ti1 C9 135.77(11) . . ? 
C1 Ti1 C9 105.99(11) . . ? 
C7 Ti1 C9 56.07(12) . . ? 
F4 Ti1 C8 117.02(10) . . ? 
C11 Ti1 C8 76.35(11) . . ? 
C10 Ti1 C8 56.01(13) . . ? 
C6 Ti1 C8 56.12(13) . . ? 
C3 Ti1 C8 121.25(12) . . ? 
C4 Ti1 C8 154.98(12) . . ? 
C2 Ti1 C8 105.02(12) . . ? 
C5 Ti1 C8 152.71(12) . . ? 
C1 Ti1 C8 119.13(12) . . ? 
C7 Ti1 C8 33.66(12) . . ? 
C9 Ti1 C8 33.65(12) . . ? 
F8 Ti2 C22 91.37(10) . . ? 
F8 Ti2 C12 101.95(14) . . ? 
C22 Ti2 C12 134.99(16) . . ? 
F8 Ti2 C16 133.83(11) . . ? 
C22 Ti2 C16 110.37(16) . . ? 
C12 Ti2 C16 34.85(15) . . ? 
F8 Ti2 C17 116.69(10) . . ? 
C22 Ti2 C17 129.86(12) . . ? 
C12 Ti2 C17 81.53(15) . . ? 
C16 Ti2 C17 80.29(13) . . ? 
F8 Ti2 C21 138.55(10) . . ? 
C22 Ti2 C21 97.34(12) . . ? 
C12 Ti2 C21 100.03(15) . . ? 
C16 Ti2 C21 80.19(11) . . ? 
C17 Ti2 C21 34.29(11) . . ? 
F8 Ti2 C18 84.64(10) . . ? 
C22 Ti2 C18 123.76(13) . . ? 
C12 Ti2 C18 100.37(15) . . ? 
C16 Ti2 C18 112.18(14) . . ? 
C17 Ti2 C18 34.45(11) . . ? 
C21 Ti2 C18 56.97(11) . . ? 
F8 Ti2 C19 83.10(10) . . ? 
C22 Ti2 C19 89.54(13) . . ? 
C12 Ti2 C19 134.31(15) . . ? 
C16 Ti2 C19 134.82(12) . . ? 
C17 Ti2 C19 56.94(11) . . ? 
C21 Ti2 C19 56.67(11) . . ? 
C18 Ti2 C19 34.25(11) . . ? 
F8 Ti2 C20 113.48(10) . . ? 
C22 Ti2 C20 74.59(12) . . ? 
C12 Ti2 C20 133.70(15) . . ? 
C16 Ti2 C20 111.45(12) . . ? 
C17 Ti2 C20 56.64(12) . . ? 
C21 Ti2 C20 33.91(11) . . ? 
C18 Ti2 C20 56.66(12) . . ? 
C19 Ti2 C20 33.98(11) . . ? 
F8 Ti2 C15 121.47(10) . . ? 
C22 Ti2 C15 78.18(14) . . ? 
C12 Ti2 C15 58.10(15) . . ? 
C16 Ti2 C15 36.06(15) . . ? 
C17 Ti2 C15 113.50(13) . . ? 
C21 Ti2 C15 99.99(12) . . ? 
C18 Ti2 C15 147.44(13) . . ? 
C19 Ti2 C15 152.31(12) . . ? 
C20 Ti2 C15 118.33(12) . . ? 
F8 Ti2 C14 88.29(10) . . ? 
C22 Ti2 C14 83.22(14) . . ? 
C12 Ti2 C14 54.90(16) . . ? 
C16 Ti2 C14 56.39(12) . . ? 
C17 Ti2 C14 134.21(12) . . ? 
C21 Ti2 C14 132.89(11) . . ? 
C18 Ti2 C14 152.15(13) . . ? 
C19 Ti2 C14 168.62(12) . . ? 
C20 Ti2 C14 148.82(12) . . ? 
C15 Ti2 C14 33.70(11) . . ? 
F8 Ti2 C13 77.93(12) . . ? 
C22 Ti2 C13 114.19(16) . . ? 
C12 Ti2 C13 32.63(15) . . ? 
C16 Ti2 C13 56.17(13) . . ? 
C17 Ti2 C13 111.95(15) . . ? 
C21 Ti2 C13 132.26(14) . . ? 
C18 Ti2 C13 119.52(15) . . ? 
C19 Ti2 C13 149.64(15) . . ? 
C20 Ti2 C13 166.17(15) . . ? 
C15 Ti2 C13 56.46(14) . . ? 
C14 Ti2 C13 32.70(14) . . ? 
C2 C1 C5 108.2(3) . . ? 
C2 C1 Ti1 72.96(16) . . ? 
C5 C1 Ti1 72.72(16) . . ? 
C1 C2 C3 107.9(3) . . ? 
C1 C2 Ti1 73.32(16) . . ? 
C3 C2 Ti1 72.45(16) . . ? 
C4 C3 C2 107.9(3) . . ? 
C4 C3 Ti1 73.35(17) . . ? 
C2 C3 Ti1 73.22(17) . . ? 
C3 C4 C5 108.3(3) . . ? 
C3 C4 Ti1 72.71(18) . . ? 
C5 C4 Ti1 73.10(17) . . ? 
C4 C5 C1 107.6(3) . . ? 
C4 C5 Ti1 72.93(17) . . ? 
C1 C5 Ti1 73.03(17) . . ? 
C7 C6 C10 107.5(3) . . ? 
C7 C6 Ti1 74.1(2) . . ? 
C10 C6 Ti1 72.66(19) . . ? 
C6 C7 C8 108.1(3) . . ? 
C6 C7 Ti1 72.13(19) . . ? 
C8 C7 Ti1 73.29(18) . . ? 
C9 C8 C7 108.5(3) . . ? 
C9 C8 Ti1 73.10(18) . . ? 
C7 C8 Ti1 73.05(18) . . ? 
C10 C9 C8 108.0(3) . . ? 
C10 C9 Ti1 72.1(2) . . ? 
C8 C9 Ti1 73.25(18) . . ? 
C9 C10 C6 108.0(3) . . ? 
C9 C10 Ti1 74.2(2) . . ? 
C6 C10 Ti1 72.7(2) . . ? 
F1 C11 F2 103.7(2) . . ? 
F1 C11 F3 102.3(2) . . ? 
F2 C11 F3 102.0(2) . . ? 
F1 C11 Ti1 118.37(19) . . ? 
F2 C11 Ti1 114.0(2) . . ? 
F3 C11 Ti1 114.46(19) . . ? 
C13 C12 C16 109.9(4) . . ? 
C13 C12 Ti2 76.6(2) . . ? 
C16 C12 Ti2 73.5(2) . . ? 
C12 C13 C14 108.8(4) . . ? 
C12 C13 Ti2 70.8(2) . . ? 
C14 C13 Ti2 73.5(2) . . ? 
C13 C14 C15 111.7(4) . . ? 
C13 C14 Ti2 73.8(2) . . ? 
C15 C14 Ti2 72.88(19) . . ? 
C14 C15 C16 103.6(3) . . ? 
C14 C15 Ti2 73.41(19) . . ? 
C16 C15 Ti2 70.68(18) . . ? 
C12 C16 C15 105.9(3) . . ? 
C12 C16 Ti2 71.67(19) . . ? 
C15 C16 Ti2 73.26(18) . . ? 
C21 C17 C18 107.9(3) . . ? 
C21 C17 Ti2 73.01(18) . . ? 
C18 C17 Ti2 73.22(18) . . ? 
C19 C18 C17 107.5(3) . . ? 
C19 C18 Ti2 73.05(18) . . ? 
C17 C18 Ti2 72.33(17) . . ? 
C20 C19 C18 107.9(3) . . ? 
C20 C19 Ti2 73.12(17) . . ? 
C18 C19 Ti2 72.70(17) . . ? 
C21 C20 C19 108.5(3) . . ? 
C21 C20 Ti2 72.46(17) . . ? 
C19 C20 Ti2 72.89(17) . . ? 
C20 C21 C17 108.2(3) . . ? 
C20 C21 Ti2 73.64(18) . . ? 
C17 C21 Ti2 72.71(18) . . ? 
F6 C22 F5 103.5(3) . . ? 
F6 C22 F7 103.2(3) . . ? 
F5 C22 F7 102.6(3) . . ? 
F6 C22 Ti2 112.8(2) . . ? 
F5 C22 Ti2 118.1(2) . . ? 
F7 C22 Ti2 114.9(2) . . ? 
 
_diffrn_measured_fraction_theta_max    0.988 
_diffrn_reflns_theta_full              23.27 
_diffrn_measured_fraction_theta_full   0.988 
_refine_diff_density_max    0.542 
_refine_diff_density_min   -0.324 
_refine_diff_density_rms    0.055 
